# Supplementary material
Source: Springer Nature journal article supplement (https://www.springermedizin.de/resource/supplementary/12874_2012_875_MOESM1_ESM.pdf/9433000)

### A. >2 Partners in the Past Year

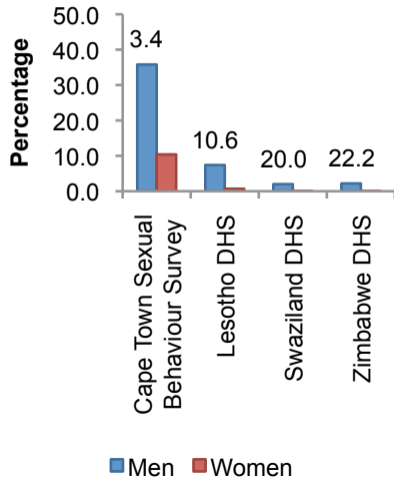

### B. >2 Lifetime Partners

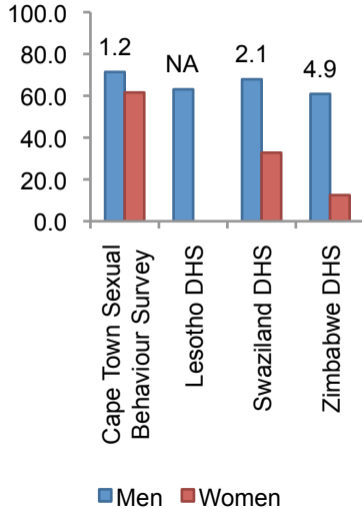

### C. Had a Concurrent Relationship

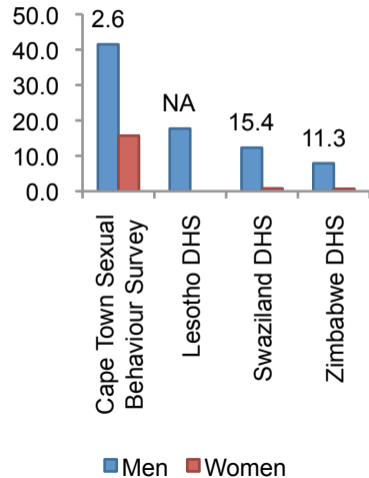

Supplement: MOESM1 [file 9433000]
